# Supplementary material for: Zirconium-Based Metal Organic Frameworks for the Capture of Carbon Dioxide and Ethanol Vapour. A Comparative Study
Source: MDPI journal article supplement (doi:10.3390/molecules26247620), 2021-12-15
Supplement: s1 [file s1]

Zirconium based metal organic frameworks for the capture of carbon dioxide and ethanol vapour. A comparative study.

Meryem Saidi<sup>1,2</sup>, Phuoc Hoang Ho<sup>1</sup>, Pankaj Yadav<sup>1</sup>, Fabrice Salles<sup>1</sup>, Clarence Charnay<sup>1</sup>, Luc Girard<sup>3</sup>, Leila Boukli-Hacene<sup>2</sup>, Philippe Trens<sup>1\*</sup>

<sup>1</sup> ICGM, Univ. Montpellier, CNRS, ENSCM, Montpellier, France

<sup>2</sup> Department of chemistry, Tlemcen University, Algeria

<sup>3</sup> ICSM, CEA, CNRS, Marcoule, France

Supporting information.

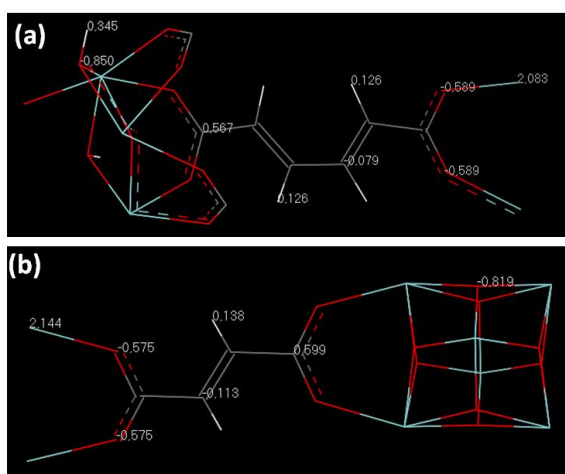

**Figure S1.** Partial charges extracted from DFT geometry-optimizations for Muc-Zr (a) and MOF-801 (b)

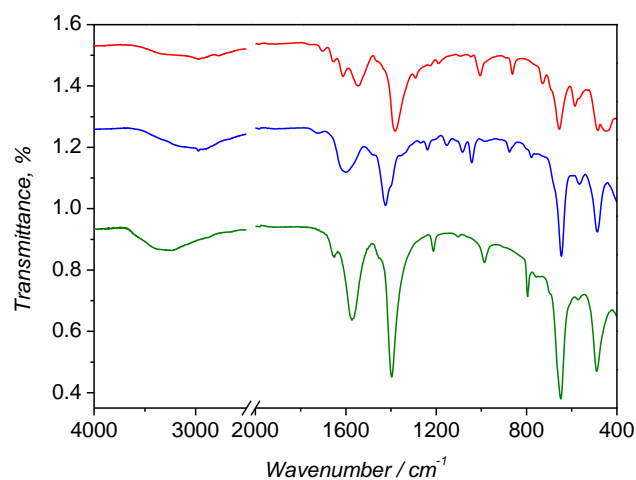

**Figure S2.** Transmittance infrared Spectra of the prepared materials. (red) MOF Zr-muconic, (blue), MOF MIP-202 and (green) MOF-801.

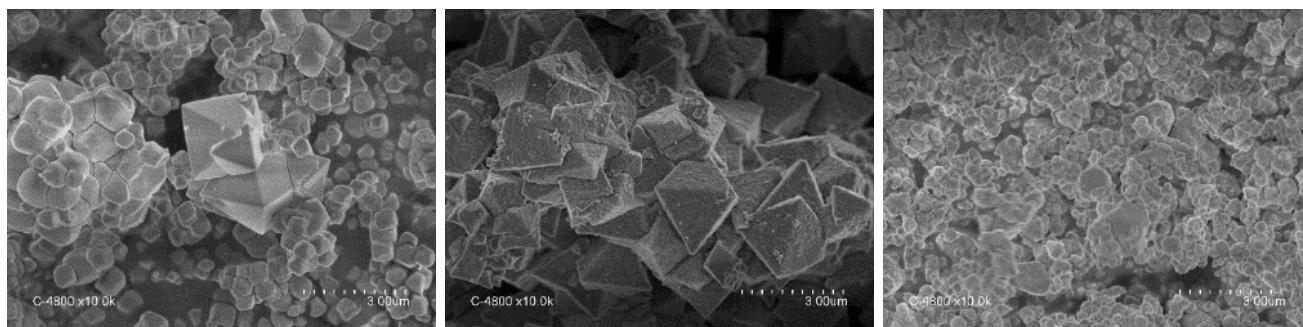

**Figure S3.** SEM image of MOFs: **(left)** MOF801 ,**(middle)** muc-Zr MOF, **(right)** MIP202.

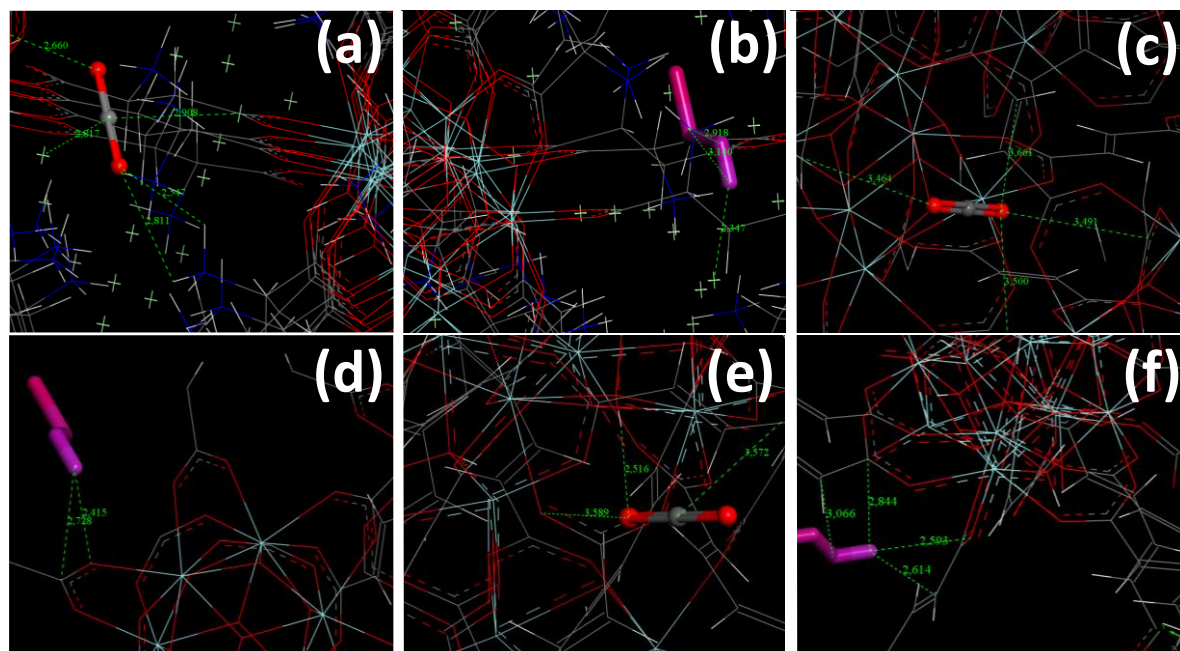

**Figure S4.** Snapshots obtained from Monte Carlo simulations and corresponding to the most probable adsorption sites for  $\text{CO}_2$  and EtOH respectively in MIP-202 (a and b), MOF-80 (c and d) and Muc-Zr (e and f). The colors of the different atoms are C (grey), O (red), H (white), Cl (green), Zr (cyan), N (blue).
